# Supplementary material for: The Role of MicroRNAs in HIV Infection
Source: MDPI journal article supplement (doi:10.3390/genes15050574), 2024-04-29
Supplement: s1 [file s1]

**Table S1.** microRNAs shown to regulate HIV-1 directly by post-transcriptional gene silencing.

| miRNA    | Target <sup>a</sup> | Cell (state)                        | Action                                       | Co-expression <sup>b</sup> | Interaction <sup>c</sup> | Effect on target protein expression <sup>d</sup> | Effect on HIV-1 replication <sup>e</sup> | References  |
|----------|---------------------|-------------------------------------|----------------------------------------------|----------------------------|--------------------------|--------------------------------------------------|------------------------------------------|-------------|
| miR-28   | 3' LTR              | CD4+ T cells (resting)              | Contributes to HIV-1 latency                 | ✓                          | ✓                        | ✓                                                | ✓                                        | [97]        |
|          | ?                   | Monocytes                           | Protects against HIV-1 infection             | ✓                          | ×                        | ×                                                | ✓                                        | [96,98]     |
| miR-29a  | Nef/ 3' LTR         | H9 cells, 293T cells, Jurkat cells. | Suppresses viral replication and infectivity | ✓                          | ✓                        | ✓                                                | ✓                                        | [91,146]    |
| miR-29b  | Nef/ 3' LTR         | H9 cells, 293T cells, Jurkat cells. | Suppresses viral replication                 | ✓                          | ✓                        | ✓                                                | ✓                                        | [91,99,146] |
| miR-92a  | pol                 | 42CD4 cells                         | Suppresses viral replication                 | ×                          | ×                        | ✓                                                | ✓                                        | [99]        |
| miR-125b | gp160/ gp41/ Rev    | CD4+ T cells (resting)              | Contributes to HIV-1 latency                 | ✓                          | ✓                        | ✓                                                | ✓                                        | [97]        |
|          | ?                   | Monocytes                           | Protects against HIV-1 infection             | ✓                          | ×                        | ×                                                | ×                                        | [98]        |
| miR-133b | gp160/gp41          | 42CD4 cells                         | Suppresses viral replication                 | ×                          | ×                        | ✓                                                | ✓                                        | [99]        |
| miR-138  | gp160/gp41          | 42CD4 cells                         | Suppresses viral replication                 | ×                          | ×                        | ✓                                                | ✓                                        | [99]        |

|          |                                                 |                                             |                                              |   |   |   |   |         |
|----------|-------------------------------------------------|---------------------------------------------|----------------------------------------------|---|---|---|---|---------|
| miR-149  | gag/p24                                         | 42CD4 cells                                 | Suppresses viral replication                 | × | × | ✓ | ✓ | [99]    |
| miR-150  | gp160/ gp41/ Rev                                | CD4+ T cells (resting)                      | Contributes to HIV-1 latency                 | ✓ | ✓ | ✓ | ✓ | [97]    |
|          | ?                                               | Monocytes                                   | Protects against HIV-1 infection             | ✓ | ✓ | ✓ | ✓ | [96,98] |
| miR-196b | Nef/ 3' LTR                                     | Jurkat (productively and latently infected) | Suppresses viral replication and infectivity | ✓ | ✓ | ✓ | ✓ | [174]   |
| miR-223  | Nef/ 3' LTR                                     | CD4+ T cells (resting)                      | Contributes to HIV-1 latency                 | ✓ | × | × | ✓ | [97]    |
|          | ?                                               | Monocytes                                   | Protects against HIV-1 infection             | ✓ | × | × | ✓ | [96]    |
| miR-326  | Nef / 3' LTR                                    | 42CD4 cells                                 | Suppresses viral replication                 | × | ✓ | ✓ | ✓ | [99]    |
| miR-382  | 3' LTR                                          | CD4+ T cells (resting)                      | Contributes to HIV-1 latency                 | ✓ | ✓ | ✓ | ✓ | [97]    |
|          | ?                                               | Monocytes                                   | Protects against HIV-1 infection             | ✓ | × | × | ✓ | [96,98] |
| miR-1290 | Site 1:<br>Nef/ 3' LTR<br><br>Site 2:<br>3' LTR | Jurkat (productively and latently infected) | Suppresses viral replication and infectivity | ✓ | ✓ | ✓ | ✓ | [174]   |

a “NA” indicates that the specific target site was not identified.  
b “✓” indicates that the co-expression of the microRNA and its proposed target in the cell of interest was demonstrated. “×” indicates that this was not demonstrated.

---

c “√” indicates that the specific interaction between the microRNA and its proposed target was demonstrated by a reporter assay. “×” indicates that this was not demonstrated.

d “√” indicates that microRNA inhibition and/or overexpression was demonstrated to affect target protein expression. “×” indicates that this was not demonstrated.

e “√” indicates that microRNA inhibition and/or overexpression was demonstrated to affect HIV-1 replication. “×” indicates that this was not demonstrated.

**Table S2.** microRNAs shown to regulate HIV-1 indirectly by post-transcriptional gene silencing.

| miRN<br>A | Target     | Cell<br>(state)                       | Action <sup>a</sup>                                                                                 | Co-<br>expression <sup>b</sup> | Interaction <sup>c</sup> | Effect on<br>target protein<br>expression <sup>d</sup> | Biological<br>effect <sup>e</sup> | References    |
|-----------|------------|---------------------------------------|-----------------------------------------------------------------------------------------------------|--------------------------------|--------------------------|--------------------------------------------------------|-----------------------------------|---------------|
| let-7     | IL-10      | HUT78 cells                           | NA                                                                                                  | ✓                              | ✓                        | ✓                                                      | ×                                 | [128]         |
| let-7c    | P21/CDKN1A | HeLa-CCR5,<br>JLTRG-R5 cells          | Enhanced HIV-1<br>replication                                                                       | ✓                              | ✓                        | ×                                                      | ✓                                 | [187]         |
| miR-9     | BLIMP1     | CD4+ T cells                          | Enhanced IL-2 secretion                                                                             | ✓                              | ✓                        | ✓                                                      | ✓                                 | [192]         |
| miR-15a   | Pur-Alpha  | Monocytes                             | Protects against HIV-1<br>infection                                                                 | ✓                              | ✓                        | ✓                                                      | ✓                                 | [172]         |
| miR-15b   | Pur-Alpha  | Monocytes                             | Protects against HIV-1<br>infection                                                                 | ✓                              | ✓                        | ✓                                                      | ✓                                 | [172]         |
| miR-16    | Pur-Alpha  | Monocytes                             | Protects against HIV-1<br>infection                                                                 | ✓                              | ✓                        | ✓                                                      | ✓                                 | [172]         |
| miR-17-5p | KAT2B/PCAF | HeLa cells, PBMC                      | Reduced HIV-1<br>replication                                                                        | ✓                              | ✓                        | ×                                                      | ✓                                 | [92]          |
| miR-20a   | KAT2B/PCAF | HeLa cells, PBMC                      | Reduced HIV-1<br>replication                                                                        | ✓                              | ✓                        | ×                                                      | ✓                                 | [92]          |
|           | Pur-Alpha  | Monocytes                             | Protects against HIV-1<br>infection                                                                 | ✓                              | ✓                        | ✓                                                      | ✓                                 | [172]         |
| miR-21    | IP-10      | Monocytes, THP-1<br>cells, 293T cells | Excessive inflammation,<br>immune dysfunction,<br>disease progression,<br>reduced HIV-1 replication | ✓                              | ✓                        | ✓                                                      | ✓                                 | [104–106,110] |

| in CD4+ T cells and macrophages |                                    |                                            |                                                                      |   |   |   |   |                  |
|---------------------------------|------------------------------------|--------------------------------------------|----------------------------------------------------------------------|---|---|---|---|------------------|
| miR-25                          | MARCH1                             | Macrophages                                | Pro-viral (Evasion of HIV-1 restriction by MARCH1)                   | ✓ | ✓ | ✓ | ✓ | [178]            |
| miR-27b                         | Cyclin T1                          | CD4+ T cells (resting)                     | Reduced HIV-1 replication                                            | ✓ | ✓ | ✓ | ✓ | [114]            |
| miR-29a                         | Mcl-1, DNMT 3A/B, Tcl1, p85, CDC42 | Hela, KMCH, A549, HEK293 cells             | NA                                                                   | ✓ | ✓ | ✓ | ✓ | [94,116–118,177] |
| miR-29b                         | Cyclin T1 (indirectly?)            | CD4+ T cells (resting)                     | Reduced HIV-1 replication                                            | ✓ | ✓ | × | ✓ | [114]            |
|                                 | Mcl-1, DNMT 3A/B, Tcl1, p85, CDC42 | Hela, KMCH, A549, HEK293 cells             | NA                                                                   | ✓ | ✓ | ✓ | ✓ | [94,116–118,177] |
|                                 | IL-32                              | CD4+ T cells, CD14+ monocytes, HepG2 cells | Suppression of antiviral immune response, enhanced HIV-1 replication | ✓ | ✓ | × | × | [120,121]        |
| miR-30b                         | CD73                               | CD8 T cells                                | Impaired cytotoxic phenotype, greater migratory capability           | ✓ | × | ✓ | ✓ | [125]            |
| miR-30c                         | CD73                               | CD8 T cells                                | Impaired cytotoxic phenotype, greater migratory capability           | ✓ | × | ✓ | ✓ | [125]            |

|            |                                      |                                       |                                                                     |   |   |   |   |       |
|------------|--------------------------------------|---------------------------------------|---------------------------------------------------------------------|---|---|---|---|-------|
| miR-30e    | CD73                                 | CD8 T cells                           | Impaired cytotoxic phenotype, greater migratory capability          | ✓ | × | ✓ | ✓ | [125] |
|            | SIRT1                                | TZM-bl                                | Increased Tat-induced LTR transactivation                           | ✓ | ✓ | ✓ | ✓ | [185] |
| miR-34a    | PNUTS                                | HEK293T, TZM-bl, MOLT-3, Jurkat cells | Enhanced HIV-1 replication                                          | ✓ | ✓ | ✓ | ✓ | [186] |
|            | TASK1                                | HeLa-CCR5, JLTRG-R5 cells             | Enhanced HIV-1 replication                                          | ✓ | ✓ | ✓ | ✓ | [187] |
| miR-34c-5p | KAT2B/PCAF                           | CD4+ T cells (naive TCR-stimulated)   | Enhanced HIV-1 replication                                          | ✓ | ✓ | ✓ | ✓ | [126] |
|            | JHDM1D, ARGEF12, CD55, PREX2, IFITM2 | Jurkat cells                          | NA                                                                  | × | × | ✓ | × | [126] |
| miR-93     | MARCH1                               | Macrophages                           | Enhanced HIV-1 replication (Evasion of HIV-1 restriction by MARCH1) | ✓ | ✓ | ✓ | ✓ | [178] |
|            | Pur-Alpha                            | Monocytes                             | Protects against HIV-1 infection                                    | ✓ | ✓ | ✓ | ✓ | [172] |
| miR-106b   | Pur-Alpha                            | Monocytes                             | Protects against HIV-1 infection                                    | ✓ | ✓ | ✓ | ✓ | [172] |
| miR-124a   | TASK1                                | HeLa-CCR5, JLTRG-R5 cells             | Enhanced HIV-1 replication                                          | ✓ | ✓ | ✓ | ✓ | [187] |

| Table 1. miRNAs and their target genes and their effects on HIV-1 replication. |                                                                                |                                   |                                 |                             |                             |                             |                             |                          |
|--------------------------------------------------------------------------------|--------------------------------------------------------------------------------|-----------------------------------|---------------------------------|-----------------------------|-----------------------------|-----------------------------|-----------------------------|--------------------------|
| miRNA                                                                          | Target Gene                                                                    | Cell Type                         | Effect on HIV-1 Replication     | Effect on HIV-1 Replication | Effect on HIV-1 Replication | Effect on HIV-1 Replication | Effect on HIV-1 Replication | Reference                |
| miR-132                                                                        | MeCP2                                                                          | Jurkat cells                      | Enhanced HIV-1 replication      | ✓                           | ✓                           | ×                           | ✓                           | [189,190]                |
| miR-139-5p                                                                     | FOXO1                                                                          | J-Lat cells                       | Reactivation of latent provirus | ✓                           | ×                           | ×                           | ×                           | [127]                    |
| miR-146a                                                                       | CXCR4                                                                          | CD4+ T cells (resting, activated) | Reduced HIV-1 replication       | ✓                           | ✓                           | ✓                           | ✓                           | [103,173]                |
|                                                                                | TRAF6                                                                          | CD4+ T cells (resting, activated) | Reduced HIV-1 replication       | ✓                           | ✓                           | ✓                           | ✓                           | [103,179,180]            |
|                                                                                | CCL5                                                                           | Macrophages                       | Reduced monocyte migration      | ✓                           | ✓                           | ✓                           | ✓                           | [111]                    |
|                                                                                | CCL8/MCP-2                                                                     | Microglia                         | Enhanced HIV-1 replication      | ✓                           | ✓                           | ✓                           | ✓                           | [181]                    |
| miR-150                                                                        | Cyclin T1 (indirectly)                                                         | CD4+ T cells (resting)            | Reduced HIV-1 replication       | ✓                           | ×                           | ✓                           | ✓                           | [114]                    |
| miR-155                                                                        | TRIM32, LEDGF, ADAM10, TNPO3, Nup153, INPP5D, SOCS1, SAMHD1, PU.1, many others | MDM                               | Reduced HIV-1 replication       | ✓                           | ✓                           | ✓                           | ✓                           | [84,124,170,171,175,176] |
|                                                                                | SAMHD1                                                                         | Astrocytes, microglia             | Enhanced HIV-1 replication      | ✓                           | ×                           | ✓                           | ✓                           | [124]                    |
| miR-181-5p                                                                     | DDX3X                                                                          | PBMC, Jurkat, H9-IIIB cells       | Reduced HIV-1 replication       | ✓                           | ✓                           | ✓                           | ✓                           | [145]                    |

|         |                           |                                                  |                                              |   |   |   |   |          |
|---------|---------------------------|--------------------------------------------------|----------------------------------------------|---|---|---|---|----------|
|         | SAMHD1                    | Astrocytes,<br>microglia                         | Enhanced HIV-1<br>replication                | ✓ | × | ✓ | ✓ | [124]    |
| miR-182 | NAMPT                     | TZM-bl cells                                     | Increased Tat-induced<br>LTR transactivation | ✓ | ✓ | ✓ | ✓ | [191]    |
| miR-186 | HRB, HIVP2                | Sup-T1, Jurkat cells,<br>HeLa MAGI-CCR5<br>cells | Reduced HIV-1<br>replication                 | ✓ | ✓ | ✓ | ✓ | [182]    |
| miR-198 | Cyclin T1                 | Monocytes                                        | Reduced HIV-1<br>replication                 | ✓ | ✓ | ✓ | ✓ | [113]    |
| miR-210 | Dicer1, HIVP2             | Sup-T1, Jurkat cells,<br>HeLa MAGI-CCR5<br>cells | Reduced HIV-1<br>replication                 | ✓ | ✓ | ✓ | ✓ | [182]    |
| miR-217 | SIRT1                     | MAGI cells                                       | Increased Tat-induced<br>LTR transactivation | ✓ | ✓ | ✓ | ✓ | [184]    |
| miR-221 | CD4                       | Macrophages                                      | Inhibited HIV-1 entry                        | ✓ | ✓ | ✓ | ✓ | [141]    |
| miR-222 | HRB, Dicer1               | Sup-T1, Jurkat cells,<br>HeLa MAGI-CCR5<br>cells | Reduced HIV-1<br>replication                 | ✓ | ✓ | ✓ | ✓ | [182]    |
|         | CD4                       | Macrophages                                      | Inhibited HIV-1 entry                        | ✓ | ✓ | ✓ | ✓ | [141]    |
| miR-223 | Cyclin T1<br>(indirectly) | CD4+ T cells<br>(resting)                        | Reduced HIV-1<br>replication                 | ✓ | × | ✓ | ✓ | [114]    |
|         | Sp3, LIF, RhoB            | HEK293 cells                                     | ?                                            | × | ✓ | × | × | [94,115] |



|          |       |           |                                  |   |   |   |   |       |
|----------|-------|-----------|----------------------------------|---|---|---|---|-------|
| miR-1236 | VprBP | Monocytes | Protects against HIV-1 infection | ✓ | ✓ | ✓ | ✓ | [188] |
|----------|-------|-----------|----------------------------------|---|---|---|---|-------|

a “NA” indicates that the effect on HIV-1 replication or disease was not described.

b “✓” indicates that the co-expression of the microRNA and its proposed target in the cell of interest was demonstrated. “×” indicates that this was not demonstrated.

c “✓” indicates that the specific interaction between the microRNA and its proposed target was demonstrated by a reporter assay. “×” indicates that this was not demonstrated.

d “✓” indicates that microRNA inhibition and/or overexpression was demonstrated to affect target protein expression. “×” indicates that this was not demonstrated.

e “✓” indicates that microRNA inhibition and/or overexpression was demonstrated to affect HIV-1 replication or biological function relevant to HIV-1 infection. “×” indicates that this was not demonstrated.

**Table S3.** microRNAs modulated by HIV-1 infection (productive, latent, or bystander) or HIV-1 proteins.

| UP-REGULATED BY HIV-1 |                                        |                                   |            |
|-----------------------|----------------------------------------|-----------------------------------|------------|
| miRNA                 | Cell (state)                           | Regulation                        | References |
| miR-9                 | SupT1 cells                            | productive infection              | [182]      |
| miR-10a-5p            | CD4+ T cells                           | latent or reactivated infection   | [194]      |
| miR-15a-5p            | PBMC-derived EVs                       | productive infection              | [143]      |
| miR-15b-5p            | PBMC-derived EVs                       | productive infection              | [143]      |
| miR-16-2-3p           | CD4+ T cells                           | latent or reactivated infection   | [194]      |
| miR-21                | Macrophages, THP-1 cells               | productive infection, Tat & gp120 | [193]      |
|                       | Macrophage- and THP-1 cell-derived EVs | Tat & gp120                       | [193]      |
| miR-23a               | Macrophages, THP-1 cells               | productive infection, Tat & gp120 | [193]      |
|                       | Macrophage- and THP-1 cell-derived EVs | Tat & gp120                       | [193]      |
| miR-25                | Macrophages                            | Vpu                               | [178]      |
| miR-27a               | Macrophages, THP-1 cells               | productive infection, Tat & gp120 | [193]      |
|                       | Macrophage- and THP-1 cell-derived EVs | Tat & gp120                       | [193]      |
| miR-33b-5p            | Macrophages, others                    | productive infection              | [183]      |
| miR-34a               | Jurkat cells                           | productive infection              | [92]       |
| miR-93                | Macrophages                            | Vpu                               | [178]      |

|             |                                        |                                   |           |
|-------------|----------------------------------------|-----------------------------------|-----------|
|             |                                        |                                   |           |
| miR-96-5p   | CD4+ T cells                           | latent or reactivated infection   | [194]     |
| miR-98      | CD4+ T cells                           | latent infection                  | [148]     |
| miR-99b-5p  | CD4+ T cells                           | latent or reactivated infection   | [194]     |
| miR-106a-5p | CD4+ T cells                           | latent or reactivated infection   | [194]     |
| miR-107     | CD4+ T cells                           | latent or reactivated infection   | [194]     |
| miR-122a    | Jurkat cells                           | productive infection              | [92]      |
| miR-125a-5p | CD4+ T cells                           | latent or reactivated infection   | [194]     |
| miR-142-5p  | CD4+ T cells                           | latent or reactivated infection   | [194]     |
| miR-142-3p  | PBMC-derived EVs                       | productive infection              | [143]     |
| miR-146a    | Macrophages                            | productive infection              | [111]     |
| miR-148a-5p | CD4+ T cells                           | latent or reactivated infection   | [194]     |
| miR-148a-3p | CD4+ T cells                           | latent or reactivated infection   | [194]     |
| miR-148b    | Macrophages                            | productive infection              | [144]     |
| miR-150-3p  | CD4+ T cells                           | latent or reactivated infection   | [194]     |
| miR-151a-5p | CD4+ T cells                           | latent or reactivated infection   | [194]     |
| miR-155-5p  | PBMC                                   | productive infection              | [142]     |
|             | Macrophages, THP-1 cells               | productive infection, Tat & gp120 | [130,193] |
|             | Macrophage- and THP-1 cell-derived EVs | Tat & gp120                       | [193]     |
| miR-155-3p  | Macrophages                            | productive infection              | [130]     |

|             |                                        |                                 |       |
|-------------|----------------------------------------|---------------------------------|-------|
|             |                                        |                                 |       |
| miR-181a-5p | PBMC-derived EVs                       | productive infection            | [143] |
| miR-185a-5p | CD4+ T cells                           | latent or reactivated infection | [194] |
| miR-186     | SupT1 cells                            | productive infection            | [182] |
| miR-192-5p  | CD4+ T cells                           | latent or reactivated infection | [194] |
| miR-192     | SupT1 cells                            | productive infection            | [182] |
| miR-200c    | SupT1 cells                            | productive infection            | [182] |
| miR-206     | Jurkat cells                           | productive infection            | [92]  |
| miR-210-5p  | CD4+ T cells                           | latent or reactivated infection | [194] |
| miR-210     | Jurkat cells                           | productive infection            | [92]  |
| miR-210     | SupT1 cells                            | productive infection            | [182] |
| miR-221     | Macrophages                            | bystander                       | [141] |
| miR-222     | SupT1 cells                            | productive infection            | [182] |
|             | Macrophages                            | bystander                       | [141] |
| miR-223     | CD4+CD8- PBMC, CEM cells, Jurkat cells | productive infection            | [94]  |
| miR-297     | Jurkat cells                           | productive infection            | [92]  |
| miR-320a    | CD4+ T cells                           | latent or reactivated infection | [194] |
| miR-320     | Jurkat cells                           | productive infection            | [92]  |
| miR-342-3p  | CD4+ T cells                           | latent or reactivated infection | [194] |
| miR-361-5p  | SupT1 cells                            | productive infection            | [182] |

|              |                                        |                                 |       |
|--------------|----------------------------------------|---------------------------------|-------|
| miR-370      | Jurkat cells                           | productive infection            | [92]  |
| miR-373-3p   | Jurkat cells                           | productive infection            | [92]  |
| miR-382      | Jurkat cells                           | productive infection            | [92]  |
| miR-383      | Jurkat cells                           | productive infection            | [92]  |
| miR-424-3p   | CD4+ T cells                           | latent or reactivated infection | [194] |
| miR-485      | Jurkat cells                           | productive infection            | [92]  |
| miR-497-5p   | CD4+ T cells                           | latent or reactivated infection | [194] |
| miR-590-3p   | CD4+ T cells                           | latent or reactivated infection | [194] |
| miR-1246     | PBMC-derived EVs                       | productive infection            | [143] |
| miR-1268a    | CD4+ T cells<br>(naive TCR-stimulated) | productive infection            | [126] |
| miR-1273g-3p | CD4+ T cells                           | latent or reactivated infection | [194] |
| miR-1275     | CD4+ T cells                           | latent or reactivated infection | [194] |
| miR-1307-5p  | CD4+ T cells                           | latent or reactivated infection | [194] |
| miR-3195     | PBMC                                   | productive infection            | [144] |
| miR-3613-5p  | CD4+ T cells                           | latent or reactivated infection | [194] |
| miR-3653-3p  | PBMC                                   | productive infection            | [144] |
| miR-3656     | PBMC                                   | productive infection            | [144] |
| miR-4488     | CD4+ T cells                           | latent infection                | [148] |

|                         |              |                                 |            |
|-------------------------|--------------|---------------------------------|------------|
|                         |              |                                 |            |
| miR-4492                | PBMC         | productive infection            | [144]      |
|                         | PBMC         | productive infection            | [144]      |
| miR-4516                | CD4+ T cells | latent infection                | [148]      |
|                         | PBMC         | productive infection            | [144]      |
| miR-4677-3p             | CD4+ T cells | latent or reactivated infection | [194]      |
| miR-4697-3p             | CD4+ T cells | latent or reactivated infection | [194]      |
| miR-6087                | PBMC         | productive infection            | [144]      |
| miR-7974                | CD4+ T cells | latent infection                | [148]      |
| DOWN-REGULATED BY HIV-1 |              |                                 |            |
| miRNA                   | Cell (state) | Regulation                      | References |
| let-7d                  | PBMC         | productive infection            | [144]      |
| let-7i                  | CD4 T cells  | productive infection            | [102]      |
| miR-7-1                 | PBMC         | productive infection            | [144]      |
| miR-7-2                 | PBMC         | productive infection            | [144]      |
| miR-7-3                 | PBMC         | productive infection            | [144]      |
| miR-16                  | HeLa cells   | productive infection            | [195]      |
| miR-17/92 cluster       | Jurkat cells | productive infection            | [92]       |

|                                                                       |                                         |                      |       |
|-----------------------------------------------------------------------|-----------------------------------------|----------------------|-------|
| (miR-17-5p, miR-17-3p, miR-18, miR-19a, miR-20a, miR-19b-1, miR-92-1) |                                         |                      |       |
| miR-21                                                                | CD4+CD8- PBMC                           | productive infection | [94]  |
| miR-26a-2-3p                                                          | PBMC                                    | productive infection | [144] |
| miR-29a                                                               | CD4+CD8- PBMC, CEM cells, Jurkat cells  | productive infection | [94]  |
| miR-29b                                                               | CD4+CD8- PBMC, CEM cells, Jurkat cells  | productive infection | [94]  |
| miR-29c                                                               | CD4+CD8- PBMC, CEM cells, Jurkat cells  | productive infection | [94]  |
| miR-34c-5p                                                            | CD4+ T cells<br>(naive TCR-stimulated)  | productive infection | [126] |
| miR-92b-3p                                                            | PBMC                                    | productive infection | [144] |
| miR-93                                                                | HeLa cells                              | productive infection | [195] |
| miR-126-5p                                                            | CD4+ T cells<br>(naive TCR-stimulated)  | productive infection | [126] |
| miR-126-3p                                                            | CD4+ T cells<br>(naive TCR-stimulated)  | productive infection | [126] |
| miR-143-3p                                                            | CD4+ T cells<br>(naive TCR-stimulated)  | productive infection | [126] |
| miR-148b                                                              | HeLa cells                              | productive infection | [195] |
| miR-150-5p                                                            | Macrophages                             | productive infection | [130] |
| miR-155-5p                                                            | CD4+ CD8- PBMC, CEM cells, Jurkat cells | productive infection | [94]  |

|                        |                                        |                      |       |
|------------------------|----------------------------------------|----------------------|-------|
|                        |                                        |                      |       |
| miR-185-5p             | PBMC                                   | productive infection | [144] |
| miR-191-5p             | PBMC                                   | productive infection | [144] |
| miR-199a-1             | PBMC                                   | productive infection | [144] |
| miR-199a-2             | PBMC                                   | productive infection | [144] |
| miR-221                | HeLa cells                             | productive infection | [195] |
| miR-371a-5p            | PBMC-derived EVs                       | productive infection | [143] |
| miR-379-5p             | CD4+ T cells<br>(naive TCR-stimulated) | productive infection | [126] |
| miR-411-5p             | PBMC-derived EVs                       | productive infection | [143] |
| miR-484                | PBMC                                   | productive infection | [144] |
| miR-502-5p             | PBMC-derived EVs                       | productive infection | [143] |
| miR-548aa +miR-548t-3p | PBMC-derived EVs                       | productive infection | [143] |
| miR-570-3p             | PBMC-derived EVs                       | productive infection | [143] |
| miR-603                | PBMC-derived EVs                       | productive infection | [143] |
| miR-627-5p             | PBMC-derived EVs                       | productive infection | [143] |
| miR-644a               | PBMC-derived EVs                       | productive infection | [143] |
| miR-671-3p             | PBMC                                   | productive infection | [144] |
| miR-671-5p             | PBMC                                   | productive infection | [144] |
| miR-1253               | PBMC-derived EVs                       | productive infection | [143] |



|              |                  |                      |       |
|--------------|------------------|----------------------|-------|
|              |                  |                      |       |
| miR-1273h-5p | PBMC             | productive infection | [144] |
| miR-1273h-3p | PBMC             | productive infection | [144] |
| miR-1290     | PBMC-derived EVs | productive infection | [143] |
| miR-1301-3p  | PBMC             | productive infection | [144] |
| miR-4531     | PBMC-derived EVs | productive infection | [143] |
| miR-4536- 5p | PBMC-derived EVs | productive infection | [143] |
